# Supplementary material for: Modeling the long-term fate of injected CO 2 in saline aquifers: An integrated framework coupling multiphase flow, dissolution, reaction, and ripening
Source: Copernicus journal article supplement (doi:10.5194/egusphere-2026-715), 2026-02-24
Supplement: Supplementary file [file egusphere-2026-715-AC1-supplement.pdf]

1 We sincerely thank the reviewer for the careful reading of our preprint and for the  
2 constructive and insightful comments. We greatly appreciate the positive evaluation of  
3 our research. Following the reviewer’s suggestions, we have revised the manuscript to  
4 improve its clarity, rigor, and presentation. Our detailed responses are provided below:

5 **Comment 1**

6 **Lines 30-31:** “Structural trapping is when CO<sub>2</sub> moves upwards below a low-  
7 permeability caprock because of buoyancy”. Sentence not backed up by references.  
8 Please, insert literature on low-permeability sedimentary layers that affect the vertical  
9 movement of fluids:

10 - Medici, G., Munn, J. D., Parker, B.L. 2024. Delineating aquitard characteristics  
11 within a Silurian dolostone aquifer using high-density hydraulic head and fracture  
12 datasets. *Hydrogeology Journal*, 32(6), 1663-1691.

13 -Rutqvist, J. 2012. The geomechanics of CO<sub>2</sub> storage in deep sedimentary formations.  
14 *Geotechnical and Geological Engineering*, 30(3), 525-551.

15 **Response:** Thank you for this important suggestion. We agree that the statement  
16 required stronger literature support. In the revised manuscript, we will add references  
17 you mentioned to support the description.

18

19 **Comment 2 and 3**

20 **Line 70:** Summarize the overall goal of your research on geological carbon storage.  
21 Describe the three to four objectives of your research by using numbers (e.g., i, ii, and  
22 iii).

23

24 **Response:** Thank you for this suggestion. We agree that the overall research goal  
25 should be stated more explicitly. In the revised manuscript, we have added a concise  
26 statement in the Introduction in lines 64-69 to clarify the central aim of this work.

27 “Accordingly, the objectives of this study are to: (i) develop an integrated numerical  
28 framework for geological carbon storage that couples multiphase flow, dissolution-  
29 driven convection, geochemical reaction, and gravity-induced ripening; (ii) elucidate  
30 the spatiotemporal evolution and interactions of major trapping mechanisms governing  
31 the long-term migration and phase transition of injected CO<sub>2</sub> in saline aquifers; (iii)  
32 quantify how reactive transport and associated porosity–permeability changes influence  
33 plume migration and dissolution behaviour; and (iv) evaluate the effects of calcite  
34 content and reservoir heterogeneity on the long-term fate of CO<sub>2</sub>.”

35

36 **Comment 4 and 5**

37 **Line 130: Specify the type of porosity, total or effective/kinematic? You mention**  
38 **“pore structure connectivity” just five lines above. I assume you’re dealing with**  
39 **effective porosity.**

40 **Response:** Thank you for pointing out this ambiguity. We agree that the type of  
41 porosity should be explicitly defined. As our model is unable to capture the microscopic  
42 evolution of pore structure, the above discussion on changes in the pore-space structure  
43 was intended only to emphasize the effect of geochemical reactions on porosity. In fact,  
44 it is the average porosity of REV that updates in real time based on the reaction.

45

46 **Comment 6**

47 **Line 132: Two different equations. Is it ok using “a and b”?**

48 **Response:** Thank you for this careful observation. We agree that using the same  
49 notation style for different equations may create confusion. In the revised manuscript,  
50 we have adjusted the equation number to avoid ambiguity and to ensure that each  
51 equation is clearly distinguished.

52 “ $\phi = \phi_0 + x_{CaCO_3} \left( \frac{c_{CaCO_3,r}}{c_{CaCO_3,0}} \right)$ , (9)

53  $k = k_0 \left( \frac{\phi}{\phi_0} \right)^3 \left( \frac{1-\phi_0}{1-\phi} \right)^2$ , (10)”

54

55 **Comment 7**

56 **Line 148: Lots of equations in the manuscript. Are all of them necessary?**

57 **Response:** We understand the reviewer’s concern that an excessive number of  
58 equations may affect readability. We carefully re-examined all of the mathematical  
59 expressions and confirmed that each equation is necessary for the completeness and  
60 clarity of the model formulation. This is because the present model simultaneously  
61 considers multiphase flow, dissolution and phase transition, geochemical reactions,  
62 gravity-driven ripening, and the coupling among these processes. Each group of  
63 equations describes a specific physical or physicochemical process or its interaction  
64 with the others. Removing any of them would make the model description incomplete.

65

66 **Comment 8**

67 **Table 1: Specify the type of porosity.**

68 **Response:** The reported porosity is **average total porosity** of REV. The influence of  
69 pore connectivity was not taken into account here.

70

71 **Comment 9 and 10**

72 **Figure 1 and 2: Do you need an approximate spatial scale for this conceptual**  
73 **model?**

74 **Response:** We thank the reviewer for this suggestion. Because Figure 1 is a  
75 conceptual schematic rather than a direct representation of a measured physical domain,  
76 it was originally prepared without a scale. The model was established based on the finite

77 element method, and thus is suitable for macroscopic characterization. In Figure 2, we  
78 present the length and width of the model (the detailed parameters are given in Table  
79 1).

80 **Comment 11 and 12**

81 **Figure 10 and 12: Increase the graphic resolution. Contours are not clear.**

82 **Response:** We appreciate this comment and fully agree. The compression of images  
83 by PDF reduces the readability of the images. Figure 10 and 12 have also been replaced  
84 with a higher-resolution version in the revised manuscript so that the contour patterns  
85 can be more clearly distinguished. High-definition images will be added in the  
86 supplements.

87

88 **Comment 13**

89 **Figure 13: Make this graph much larger.**

90 **Response:** Thank you for this suggestion. We agree that the original size of Figure  
91 13 limited its readability. In the revised manuscript, we enlarged the figure and adjusted  
92 its layout to improve the visibility of the curves, labels, and overall graphical  
93 presentation.
